# Supplementary material for: Increased insulin resistance in intensive care: longitudinal retrospective analysis of glycaemic control patients in a New Zealand ICU
Source: PubMed Central journal article supplement — Ther Adv Endocrinol Metab. 2021 May 31;12:20420188211012144. doi: 10.1177/20420188211012144 (PMC8173630; doi:10.1177/20420188211012144), 2021-05-31
Supplement: sj-pdf-1-tae-10.1177_20420188211012144.pdf [file sj-pdf-1-tae-10.1177_20420188211012144.pdf]

## Supplementary File: ICING model and parameters

The clinically validated ICING (Intensive Care Insulin-Nutrition-Glucose) model of glucose-insulin metabolism [1-5] was used to identify [6] patient-specific, time-varying hourly-hour insulin sensitivity (SI). The model presented is a physiological compartment model, accounting for the appearance and clearance of insulin and glucose in blood and interstitial fluid volumes. Figure S-1 shows this model (Figure 2 in the paper) schematically.

Model equations are defined:

$$\dot{G}(t) = -p_G G(t) - S_I G(t) \frac{Q(t)}{1 + \alpha_G Q(t)} + \frac{P(t) + EGP - CNS}{V_G} \quad 1$$

$$\dot{Q}(t) = n_I (I(t) - Q(t)) - n_C \frac{Q(t)}{1 + \alpha_G Q(t)} \quad 2$$

$$\dot{I}(t) = n_K I(t) - n_L \frac{I(t)}{1 + \alpha_I I(t)} - n_I (I(t) - Q(t)) + \frac{u_{ex}(t)}{V_I} + (1 - x_L) \frac{u_{en}(G)}{V_I} \quad 3$$

$$P(t) = \min(d_2 P_2, P_{max}) + PN(t) \quad 4$$

$$\dot{P}1(t) = -d_1 P1 + D(t) \quad 5$$

$$\dot{P}2(t) = -\min(d_2 P2, P_{max}) + d_1 P1 \quad 6$$

$$u_{en}(G) = \min(\max(u_{min}, k_1 G(t) + k_2), u_{max}) \quad 7$$

Where  $G(t)$  [mmol/L] is plasma glucose concentration,  $I(t)$  and  $Q(t)$  [mU/L] are plasma and interstitial insulin concentrations. Pancreatic insulin secretion is modelled as a function of plasma glucose and is denoted  $u_{en}(G)$ . The associated parameter values and descriptions are listed in Table S-1.

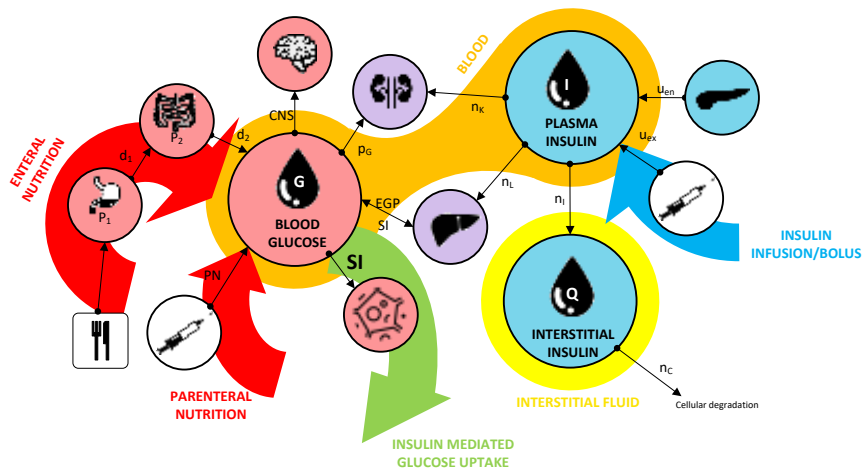

**Figure S-1:** Illustration of key dynamics of the glucose-insulin model, where key compartments include blood glucose, plasma insulin, and interstitial insulin. Arrows show the direction of glucose flux, and key abbreviations include central nervous system (CNS), Endogenous glucose production (EGP), parenteral nutrition (PN), insulin sensitivity (SI). Figure originally published in [7].

**Table S-1:** Parameter values, inputs, and model state descriptions for the glucose-insulin model.

|             | UNITS                     | DESCRIPTION                                                          |
|-------------|---------------------------|----------------------------------------------------------------------|
| $G(t)$      | mmol/L                    | Plasma glucose concentration                                         |
| $I(t)$      | mU/L                      | Plasma insulin concentration                                         |
| $Q(t)$      | mU/L                      | Interstitial insulin concentration                                   |
| $P(t)$      | mmol/min                  | Total glucose appearance from enteral and parenteral sources         |
| $PN(t)$     | mmol/min                  | Parenteral (IV) glucose appearance                                   |
| $P_1(t)$    | mmol                      | Glucose in the stomach                                               |
| $P_2(t)$    | mmol                      | Glucose in the gut                                                   |
| $D(t)$      | mmol/min                  | Glucose appearance in stomach from enteral (oral) nutrition          |
| $u_{ex}(t)$ | mU/min                    | Exogenous IV insulin input rate.                                     |
|             | VALUE/UNITS               | DESCRIPTION                                                          |
| $S_I(t)$    | l/mU/min                  | Insulin sensitivity                                                  |
| $\alpha_G$  | 1/65 (0.015) l/mU         | Saturation of insulin-mediated glucose uptake                        |
| $p_G$       | 0.006 min <sup>-1</sup>   | Other non-insulin mediated glucose clearance                         |
| $V_G$       | 13.3 L                    | Glucose distribution volume                                          |
| $EGP$       | 1.16 mmol/min             | Endogenous glucose production (hepatic)                              |
| $CNS$       | 0.3 mmol/min              | Glucose uptake by central nervous system                             |
| $x_L$       | 0.67                      | Fractional first pass hepatics insulin clearance from portal vein    |
| $n_L$       | 0.1578 min <sup>-1</sup>  | Rate parameter: general hepatic insulin clearance                    |
| $\alpha_I$  | 1.7x10 <sup>-3</sup> l/mU | Saturation of hepatics insulin clearance                             |
| $n_K$       | 0.0542 min <sup>-1</sup>  | Rate parameter: kidney clearance of insulin                          |
| $n_C$       | 0.006 min <sup>-1</sup>   | Rate parameter: cellular degradation of internalised insulin         |
| $n_I$       | 0.006 min <sup>-1</sup>   | Rate parameter: diffusion of insulin between plasma and interstitium |
| $k_1$       | 14.9 mU·l/mmol/min        | Insulin secretion model parameter                                    |
| $k_2$       | -49.9 mU/min              | Insulin secretion model parameter                                    |
| $u_{min}$   | 16.7 mU/min               | Minimum insulin secretion                                            |
| $u_{max}$   | 266.7 mU/min              | Maximum insulin secretion                                            |
| $V_I$       | 4.0 L                     | Insulin distribution volume                                          |

**Further reading:**

*Model development:* [4, 5], summarised in a supplementary file within [7]

*Model validation:* [1, 8]

*STAR protocol development:* [9, 10]

*Clinical outcome validation:* For the SPRINT protocol [2, 11, 12] and STAR protocol [3, 13]

*Insulin sensitivity and its variability:* Statistical forecasting [14, 15] and relationship with clinical variables [16-21].

## References:

1. Chase, J.G., et al., *Validation of a model-based virtual trials method for tight glycaemic control in intensive care*. Biomed Eng Online, 2010. **9**: p. 84.
2. Chase, J.G., et al., *Implementation and evaluation of the SPRINT protocol for tight glycaemic control in critically ill patients: a clinical practice change*. Critical Care, 2008. **12**(2): p. R49.
3. Stewart, K.W., et al., *Safety, efficacy and clinical generalization of the STAR protocol: a retrospective analysis*. Ann Intensive Care, 2016. **6**(1): p. 24.
4. Lin, J., et al., *A physiological Intensive Control Insulin-Nutrition-Glucose (ICING) model validated in critically ill patients*. Comput Methods Programs Biomed, 2011. **102**(2): p. 192-205.
5. Pretty, C.G., et al., *Interstitial insulin kinetic parameters for a 2-compartment insulin model with saturable clearance*. Computer methods and programs in biomedicine, 2014. **114**(3): p. e39-45.
6. Docherty, P.D., J.G. Chase, and T. David, *Characterisation of the iterative integral parameter identification method*. Medical and Biological Engineering and Computing, 2012: p. 1-8.
7. Uyttendaele, V., et al., *Untangling glycaemia and mortality in critical care*. Crit Care, 2017. **21**(1): p. 152.
8. Dickson, J.L., et al., *Generalisability of a Virtual Trials Method for Glycaemic Control in Intensive Care*. IEEE Trans Biomed Eng, 2017.
9. Fisk, L., et al., *STAR Development and Protocol Comparison*. IEEE Trans Biomed Eng, 2012. **59**(12): p. 3357-3364.
10. Evans, A., et al., *Stochastic Targeted (STAR) Glycemic Control: Design, Safety, and Performance*. Journal of Diabetes Science and Technology, 2012. **6**(1): p. 102-115.
11. Chase, J.G., et al., *Organ failure and tight glycaemic control in the SPRINT study*. Crit Care, 2010. **14**(4): p. R154.
12. Chase, J.G., et al. *Tight Glycaemic Control in Critical Care Using Insulin and Nutrition – the SPRINT Protocol*. in *6th Annual Diabetes Technology Society Meeting*. 2006. Atlanta, GA: Diabetes Technology Society.
13. Evans, A., et al., *Pilot proof of concept clinical trials of Stochastic Targeted (STAR) glycaemic control*. Annals of Intensive Care, 2011. **1**(1): p. 38.
14. Lin, J., et al., *Stochastic Modelling of Insulin Sensitivity Variability in Critical Care*. Biomedical Signal Processing & Control, 2006. **1**: p. 229-242.
15. Uyttendaele, V., et al., *A 3D insulin sensitivity prediction model enables more patient-specific prediction and model-based glycaemic control*. Biomedical Signal Processing and Control, 2018. **46**: p. 192-200.
16. Pretty, C., et al. *Corticosteroids and insulin resistance in the ICU*. in *Modelling and Control in Biomedical Systems*. 2009. Aalborg, Denmark.
17. Pretty, C., et al., *Impact of glucocorticoids on insulin resistance in the critically ill*. Comput Methods Programs Biomed, 2011. **102**(2): p. 172-80.
18. Pretty, C.G., *Analysis, classification and management of insulin sensitivity variability in a glucose-insulin system model for critical illness*, in *Mechanical Engineering*. 2012, University of Canterbury: Christchurch, New Zealand. p. 169.
19. Pretty, C.G., et al., *Variability of insulin sensitivity during the first 4 days of critical illness: implications for tight glycaemic control*. Ann Intensive Care, 2012. **2**(1): p. 17.
20. Pretty, C.G., et al., *Impact of sensor and measurement timing errors on model-based insulin sensitivity*. Comput Methods Programs Biomed, 2013.
21. Pri, A.S., et al., *Insulin Sensitivity Variability during Hypothermia*. IFAC Proceedings Volumes, 2014. **47**(3): p. 10162-10167.
